# Supplementary material for: Effect of Dietary Supplements with ω-3 Fatty Acids, Ascorbic Acid, and Polyphenolic Antioxidant Flavonoid on Gene Expression, Organ Failure, and Mortality in Endotoxemia-Induced Septic Rats
Source: MDPI journal article supplement (doi:10.3390/antiox12030659), 2023-03-07

# Supplementary Information

## **Effect of dietary $\omega$ -3 fatty acids, ascorbic acid, and polyphenolic antioxidant flavonoid supplements on gene expression, organ failure and mortality in endotoxemic-induced septic rats.**

Yolanda Prado, Cesar Echeverría, Carmen G. Feijóo, Claudia A. Riedel, Claudio Cabello-Verrugio, Juan F. Santibanez and Felipe Simon.

### **SUPPLEMENTARY MATERIAL AND METHODS**

#### **Protein expression determination of RMEC by flow cytometry**

Flow cytometry analysis was performed to determine protein expression changes of VE-Cad,  $\alpha$ -SMA, Col III, TNF- $\alpha$ , and NF- $\kappa$ B using corresponding monoclonal antibodies (all from R&D Systems, Inc), coupled to suitable secondary antibodies conjugated to fluorophores (all from ThermoFisher). The labeled cells were then analyzed immediately by flow cytometry (BD FACS Fortessa, BD Biosciences, San José, CA). Color compensation matrices were calculated for each staining combination within each experiment using single-stained antibody. In all analyses, doublets and clusters were eliminated. A minimum of 10,000 events were analyzed.

#### **Statistical analyses**

The relationships between variables were assessed by means of correlation analysis using Spearman's correlation coefficients and linear regression. The data were analyzed with GraphPad Prism version 9.4 (GraphPad Software, LLC). Samples used in the study were defined to identify the mean magnitude effect of  $\geq 2$ -fold change with standard deviations of 10%. Accordingly, a sample size of 12 rats per groups, would provide 90% statistical power using a two-sided 0.05 significance level.

### **SUPPLEMENTARY TABLE LEGENDS**

**Supplementary Table S1. Correlation analyses between mRNA expression of EndMT genes and increased permeability in the mesentery, in endotoxemic condition.**  $r^2$ : correlation coefficient and  $p$ : p-value.

**Supplementary Table S2. Correlation analyses between mRNA expression of EndMT genes and increased permeability in the liver, in endotoxemic condition.**  $r^2$ : correlation coefficient and  $p$ : p-value.

**Supplementary Table S3. Correlation analyses between mRNA expression of EndMT genes and increased permeability in the kidney, in endotoxemic condition.**  $r^2$ : correlation coefficient and  $p$ : p-value.

**Supplementary Table S4. Summary of actions of dietary  $\omega$ -3 fatty acids, ascorbic acid, and polyphenolic antioxidant flavonoid supplements on gene expression, organ failure and mortality in endotoxemic-induced septic rats.**

#### **SUPPLEMENTARY FIGURE LEGENDS**

**Supplementary Figure S1. Impact on EndMT protein expression through dietary supplementation based on  $\omega$ -3 FA, ascorbic acid or polyphenolic antioxidant flavonoids in endotoxemic rats.** (A-D) The mRNA expression of EndMT markers (endothelial marker VE-Cadherin (red bars) and fibrotic and ECM markers  $\alpha$ -SMA and Coll III (green bars)), EndMT inducer TNF- $\alpha$  (green bars) and EndMT signaling transcription factor NF- $\kappa$ B (blue bars) were detected in rats subjected to endotoxemia and supplemented with  $\omega$ -3 fatty acid ( $\omega$ -3 FA, A and B), ascorbic acid (AsA, C and D) or polyphenolic antioxidant flavonoids (Flav, E and F) through a therapeutic (A, C and E) and a prophylactic (B, D and F) protocol. (G-L) Survival percentage was determined 7 days after endotoxemia induction in rats subjected to endotoxemia and supplemented with  $\omega$ -3 fatty acid ( $\omega$ -3 FA, G and H), ascorbic acid (AsA, I and J) or polyphenolic antioxidant flavonoids (Flav, K and L) through a therapeutic (G, I and K) and a prophylactic (H, J and L) protocol. Statistical differences were assessed by a one-way analysis of variance (ANOVA) (Kruskal–Wallis) followed by Dunn's *post hoc* test. \* $p < 0.05$ , \*\* $p < 0.01$ , \*\*\* $p < 0.001$  compared with the saline-treated condition. Determination of protein expression was normalized relative to  $\beta$ -tubulin expression and are expressed relative to sham-supplemented condition. Values are expressed as the mean  $\pm$  SD. ( $N = 12$ ).

# Supplementary Table S1

## Mesentery permeability in endotoxemic rats (Evans Blue dye (ng/mg))

mRNA expression  
(Log2 (fold change))

|                 |                           | prophylactic<br>↓<br>therapeutic | sham<br>↓<br>sham         | sham<br>↓<br>ω-3FA        | ω-3FA<br>↓<br>ω-3FA       | sham<br>↓<br>AsA          | AsA<br>↓<br>AsA           | sham<br>↓<br>Flav         | Flav<br>↓<br>Flav         |
|-----------------|---------------------------|----------------------------------|---------------------------|---------------------------|---------------------------|---------------------------|---------------------------|---------------------------|---------------------------|
|                 |                           | r <sup>2</sup> p                 | r <sup>2</sup> p          | r <sup>2</sup> p          | r <sup>2</sup> p          | r <sup>2</sup> p          | r <sup>2</sup> p          | r <sup>2</sup> p          | r <sup>2</sup> p          |
| EndMT markers   | Endothelial proteins      | VE-Cad                           | <b>0.843</b> <b>0.002</b> | <b>0.820</b> <b>0.005</b> | <b>0.812</b> <b>0.006</b> | <b>0.801</b> <b>0.012</b> | <b>0.823</b> <b>0.008</b> | <b>0.804</b> <b>0.002</b> | <b>0.823</b> <b>0.004</b> |
|                 |                           | PECAM                            | 0.623 0.034               | 0.763 0.010               | 0.723 0.009               | <b>0.833</b> <b>0.011</b> | 0.775 0.009               | 0.635 0.012               | 0.735 0.009               |
|                 |                           | vWF                              | 0.645 0.023               | 0.623 0.012               | 0.734 0.011               | 0.764 0.026               | <b>0.801</b> <b>0.007</b> | 0.624 0.027               | <b>0.812</b> <b>0.008</b> |
|                 |                           | Col IV                           | 0.753 0.026               | <b>0.827</b> <b>0.002</b> | 0.745 0.030               | 0.524 0.045               | 0.597 0.042               | 0.634 0.021               | <b>0.824</b> <b>0.011</b> |
|                 | Fibrotic and ECM proteins | α-SMA                            | <b>0.853</b> <b>0.005</b> | <b>0.864</b> <b>0.006</b> | <b>0.867</b> <b>0.006</b> | <b>0.832</b> <b>0.005</b> | <b>0.826</b> <b>0.007</b> | <b>0.821</b> <b>0.006</b> | <b>0.888</b> <b>0.004</b> |
|                 |                           | SM22α                            | 0.684 0.023               | 0.734 0.023               | 0.742 0.022               | 0.753 0.014               | 0.763 0.003               | 0.724 0.021               | 0.423 0.108               |
|                 |                           | FSP-1                            | <b>0.824</b> <b>0.003</b> | 0.724 0.064               | <b>0.832</b> <b>0.023</b> | 0.628 0.023               | <b>0.812</b> <b>0.012</b> | 0.535 0.086               | 0.684 0.044               |
|                 |                           | Col I                            | 0.712 0.032               | 0.702 0.021               | <b>0.821</b> <b>0.007</b> | 0.636 0.033               | <b>0.831</b> <b>0.025</b> | 0.603 0.034               | 0.762 0.048               |
|                 |                           | Col III                          | <b>0.821</b> <b>0.003</b> | <b>0.808</b> <b>0.004</b> | <b>0.814</b> <b>0.006</b> | <b>0.834</b> <b>0.007</b> | <b>0.845</b> <b>0.008</b> | <b>0.863</b> <b>0.008</b> | <b>0.835</b> <b>0.004</b> |
|                 |                           | FN                               | 0.734 0.036               | 0.745 0.021               | 0.636 0.022               | 0.574 0.052               | 0.652 0.015               | 0.425 0.104               | 7.352 0.018               |
|                 | EndMT inducers            | IL-1β                            | 0.634 0.021               | 0.693 0.032               | 0.685 0.034               | 0.625 0.023               | 0.734 0.015               | 0.636 0.034               | 0.424 0.121               |
|                 |                           | IL-6                             | 0.735 0.023               | 0.753 0.022               | 0.734 0.045               | 0.536 0.055               | 0.634 0.010               | 0.735 0.021               | 0.635 0.037               |
|                 |                           | TNF-α                            | <b>0.825</b> <b>0.034</b> | <b>0.814</b> <b>0.006</b> | <b>0.842</b> <b>0.010</b> | <b>0.824</b> <b>0.009</b> | <b>0.864</b> <b>0.005</b> | <b>0.853</b> <b>0.010</b> | <b>0.912</b> <b>0.002</b> |
|                 |                           | TGF-β1                           | 0.636 0.045               | 0.746 0.024               | 0.536 0.052               | 0.536 0.034               | 0.536 0.580               | 0.523 0.041               | 0.724 0.027               |
|                 |                           | TGF-β2                           | 0.536 0.051               | 0.723 0.015               | 0.743 0.023               | 0.423 0.127               | 0.585 0.056               | 0.423 0.098               | <b>0.845</b> <b>0.043</b> |
| EndMT signaling | Receptors                 | IL1R                             | <b>0.842</b> <b>0.004</b> | 0.734 0.011               | <b>0.826</b> <b>0.003</b> | 0.734 0.021               | <b>0.842</b> <b>0.003</b> | 0.653 0.037               | 0.724 0.023               |
|                 |                           | IL6R                             | 0.765 0.022               | 0.786 0.032               | 0.783 0.032               | 0.535 0.057               | 0.712 0.018               | 0.646 0.043               | 0.635 0.043               |
|                 |                           | TNFR                             | 0.698 0.023               | 0.647 0.042               | 0.742 0.004               | 0.634 0.010               | 0.685 0.021               | 0.647 0.034               | <b>0.824</b> <b>0.005</b> |
|                 |                           | TβRI                             | 0.774 0.021               | 0.542 0.053               | 0.636 0.032               | 0.425 0.245               | 0.535 0.075               | 0.636 0.045               | 0.746 0.026               |
|                 |                           | TβRII                            | 0.686 0.043               | 0.577 0.046               | 0.684 0.031               | 0.486 0.174               | 0.596 0.067               | 0.643 0.041               | 0.735 0.021               |
|                 | Transcription factors     | NF-κB                            | <b>0.824</b> <b>0.007</b> | <b>0.802</b> <b>0.007</b> | <b>0.875</b> <b>0.002</b> | <b>0.823</b> <b>0.005</b> | <b>0.821</b> <b>0.003</b> | <b>0.834</b> <b>0.008</b> | <b>0.874</b> <b>0.009</b> |
|                 |                           | Smad4                            | <b>0.802</b> <b>0.010</b> | 0.746 0.009               | <b>0.807</b> <b>0.008</b> | 0.654 0.047               | 0.533 0.026               | 0.745 0.012               | 0.635 0.026               |
|                 |                           | Slug                             | <b>0.806</b> <b>0.005</b> | 0.775 0.021               | 0.735 0.008               | 0.685 0.026               | 0.643 0.021               | 0.723 0.008               | <b>0.801</b> <b>0.005</b> |
|                 |                           | Twist                            | 0.753 0.008               | 0.720 0.014               | 0.723 0.005               | 0.698 0.021               | 0.585 0.044               | 0.742 0.011               | 0.702 0.008               |
|                 |                           | Snail                            | 0.798 0.004               | 0.635 0.047               | 0.646 0.035               | 0.497 0.102               | 0.573 0.048               | 0.634 0.019               | 0.612 0.034               |
|                 |                           | Zeb-1                            | <b>0.832</b> <b>0.007</b> | 0.684 0.044               | 0.635 0.034               | 0.553 0.086               | 0.578 0.047               | 0.647 0.021               | 0.621 0.041               |
|                 | ROS enzymes               | NOX-1                            | 0.435 0.224               | 0.325 0.284               | 0.224 0.533               | 0.475 0.285               | 0.474 0.446               | 0.412 0.523               | 0.353 0.224               |
|                 |                           | NOX-2                            | 0.723 0.034               | 0.712 0.011               | 0.646 0.023               | 0.634 0.036               | 0.774 0.032               | 0.653 0.023               | 0.474 0.103               |
|                 |                           | NOX-4                            | 0.423 0.335               | 0.446 0.274               | 0.436 0.324               | 0.424 0.425               | 0.335 0.536               | 0.523 0.324               | 0.536 0.475               |

# Supplementary Table S2

## Liver permeability in endotoxemic rats (Evans Blue dye (ng/mg))

### mRNA expression (Log2 (fold change))

|                 |                           |         | prophylactic<br>↓<br>therapeutic | sham<br>↓<br>sham |                | sham<br>↓<br>ω-3FA |                | ω-3FA<br>↓<br>ω-3FA |                | sham<br>↓<br>AsA |                | AsA<br>↓<br>AsA |                | sham<br>↓<br>Flav |                | Flav<br>↓<br>Flav |  |
|-----------------|---------------------------|---------|----------------------------------|-------------------|----------------|--------------------|----------------|---------------------|----------------|------------------|----------------|-----------------|----------------|-------------------|----------------|-------------------|--|
|                 |                           |         | r <sup>2</sup>                   | p                 | r <sup>2</sup> | p                  | r <sup>2</sup> | p                   | r <sup>2</sup> | p                | r <sup>2</sup> | p               | r <sup>2</sup> | p                 | r <sup>2</sup> | p                 |  |
| EndMT markers   | Endothelial proteins      | VE-Cad  | <b>0.853</b>                     | <b>0.007</b>      | <b>0.804</b>   | <b>0.004</b>       | <b>0.864</b>   | <b>0.003</b>        | <b>0.853</b>   | <b>0.004</b>     | <b>0.864</b>   | <b>0.004</b>    | <b>0.843</b>   | <b>0.003</b>      | <b>0.812</b>   | <b>0.008</b>      |  |
|                 |                           | PECAM   | 0.745                            | 0.017             | 0.722          | 0.041              | <b>0.846</b>   | <b>0.004</b>        | <b>0.821</b>   | <b>0.002</b>     | <b>0.853</b>   | <b>0.004</b>    | 0.664          | 0.014             | <b>0.801</b>   | <b>0.008</b>      |  |
|                 |                           | vWF     | 0.698                            | 0.032             | 0.698          | 0.049              | 0.744          | 0.022               | <b>0.802</b>   | <b>0.007</b>     | 0.746          | 0.004           | 0.675          | 0.018             | 0.753          | 0.012             |  |
|                 |                           | Col IV  | 0.724                            | 0.021             | 0.753          | 0.036              | 0.646          | 0.048               | 0.643          | 0.046            | 0.636          | 0.041           | 0.646          | 0.031             | 0.732          | 0.023             |  |
|                 | Fibrotic and ECM proteins | α-SMA   | <b>0.842</b>                     | <b>0.004</b>      | <b>0.864</b>   | <b>0.007</b>       | <b>0.864</b>   | <b>0.006</b>        | <b>0.853</b>   | <b>0.005</b>     | <b>0.825</b>   | <b>0.005</b>    | <b>0.806</b>   | <b>0.002</b>      | <b>0.824</b>   | <b>0.005</b>      |  |
|                 |                           | SM22α   | <b>0.842</b>                     | <b>0.006</b>      | 0.721          | 0.032              | <b>0.857</b>   | <b>0.003</b>        | <b>0.845</b>   | <b>0.005</b>     | 0.637          | 0.024           | 0.773          | 0.043             | 0.735          | 0.108             |  |
|                 |                           | FSP-1   | <b>0.817</b>                     | <b>0.005</b>      | 0.774          | 0.048              | <b>0.835</b>   | <b>0.006</b>        | 0.646          | 0.510            | 0.753          | 0.023           | 0.685          | 0.045             | 0.634          | 0.034             |  |
|                 |                           | Col I   | 0.634                            | 0.045             | <b>0.808</b>   | <b>0.004</b>       | <b>0.854</b>   | <b>0.003</b>        | 0.735          | 0.511            | <b>0.864</b>   | <b>0.034</b>    | 0.745          | 0.019             | 0.628          | 0.046             |  |
|                 |                           | Col III | <b>0.864</b>                     | <b>0.008</b>      | <b>0.853</b>   | <b>0.005</b>       | <b>0.847</b>   | <b>0.007</b>        | <b>0.863</b>   | <b>0.006</b>     | <b>0.852</b>   | <b>0.009</b>    | <b>0.808</b>   | <b>0.004</b>      | <b>0.823</b>   | <b>0.002</b>      |  |
|                 |                           | FN      | 0.674                            | 0.043             | 0.747          | 0.17               | <b>0.864</b>   | <b>0.003</b>        | 0.657          | 0.271            | 0.736          | 0.028           | 0.545          | 0.164             | <b>0.865</b>   | <b>0.003</b>      |  |
|                 | EndMT inducers            | IL-1β   | 0.654                            | 0.031             | 0.743          | 0.025              | <b>0.831</b>   | <b>0.025</b>        | 0.746          | 0.31             | 0.732          | 0.043           | 0.745          | 0.017             | 0.545          | 0.041             |  |
|                 |                           | IL-6    | 0.636                            | 0.041             | 0.635          | 0.032              | 0.675          | 0.034               | 0.675          | 0.042            | 0.753          | 0.021           | 0.712          | 0.014             | 0.546          | 0.045             |  |
|                 |                           | TNF-α   | <b>0.845</b>                     | <b>0.006</b>      | <b>0.821</b>   | <b>0.004</b>       | <b>0.802</b>   | <b>0.007</b>        | <b>0.827</b>   | <b>0.004</b>     | <b>0.857</b>   | <b>0.003</b>    | <b>0.835</b>   | <b>0.003</b>      | <b>0.845</b>   | <b>0.003</b>      |  |
|                 |                           | TGF-β1  | 0.674                            | 0.036             | 0.690          | 0.032              | 0.547          | 0.185               | 0.623          | 0.042            | 0.636          | 0.032           | 0.635          | 0.047             | 0.646          | 0.076             |  |
|                 |                           | TGF-β2  | 0.612                            | 0.042             | 0.775          | 0.009              | 0.528          | 0.123               | 0.546          | 0.164            | 0.585          | 0.041           | 0.546          | 0.232             | 0.536          | 0.051             |  |
|                 |                           |         |                                  |                   |                |                    |                |                     |                |                  |                |                 |                |                   |                |                   |  |
| EndMT signaling | Receptors                 | IL1R    | <b>0.832</b>                     | <b>0.006</b>      | 0.743          | 0.023              | 0.747          | 0.024               | 0.652          | 0.164            | <b>0.825</b>   | <b>0.023</b>    | 0.753          | 0.024             | 0.735          | 0.034             |  |
|                 |                           | IL6R    | 0.698                            | 0.016             | 0.734          | 0.018              | <b>0.863</b>   | <b>0.008</b>        | 0.754          | 0.076            | 0.753          | 0.015           | 0.710          | 0.019             | 0.743          | 0.043             |  |
|                 |                           | TNFR    | 0.735                            | 0.025             | 0.763          | 0.037              | <b>0.844</b>   | <b>0.002</b>        | 0.523          | 0.274            | 0.735          | 0.024           | 0.764          | 0.024             | 0.724          | 0.024             |  |
|                 |                           | TβRI    | 0.586                            | 0.052             | 0.634          | 0.034              | 0.735          | 0.085               | 0.525          | 0.253            | 0.628          | 0.023           | 0.724          | 0.023             | <b>0.846</b>   | <b>0.003</b>      |  |
|                 |                           | TβRII   | 0.596                            | 0.580             | 0.624          | 0.032              | 0.636          | 0.143               | 0.567          | 0.324            | 0.535          | 0.045           | 0.647          | 0.042             | <b>0.854</b>   | <b>0.004</b>      |  |
|                 |                           |         |                                  |                   |                |                    |                |                     |                |                  |                |                 |                |                   |                |                   |  |
|                 | Transcription factors     | NF-κB   | <b>0.842</b>                     | <b>0.004</b>      | <b>0.832</b>   | <b>0.005</b>       | <b>0.864</b>   | <b>0.001</b>        | <b>0.853</b>   | <b>0.003</b>     | <b>0.815</b>   | <b>0.004</b>    | <b>0.834</b>   | <b>0.003</b>      | <b>0.843</b>   | <b>0.005</b>      |  |
|                 |                           | Smad4   | <b>0.864</b>                     | <b>0.003</b>      | 0.724          | 0.013              | <b>0.807</b>   | <b>0.003</b>        | 0.763          | 0.042            | <b>0.811</b>   | <b>0.023</b>    | 0.723          | 0.032             | 0.685          | 0.034             |  |
|                 |                           | Slug    | 0.753                            | 0.078             | 0.746          | 0.035              | <b>0.802</b>   | <b>0.005</b>        | <b>0.835</b>   | <b>0.002</b>     | 0.843          | 0.004           | 0.754          | 0.042             | <b>0.832</b>   | <b>0.006</b>      |  |
|                 |                           | Twist   | <b>0.824</b>                     | <b>0.006</b>      | <b>0.823</b>   | <b>0.003</b>       | 0.642          | 0.632               | 0.735          | 0.033            | 0.734          | 0.032           | 0.742          | 0.034             | 0.708          | 0.003             |  |
|                 |                           | Snail   | <b>0.835</b>                     | <b>0.008</b>      | 0.735          | 0.414              | 0.753          | 0.032               | 0.585          | 0.153            | 0.698          | 0.038           | 0.635          | 0.051             | 0.536          | 0.046             |  |
|                 |                           | Zeb-1   | <b>0.835</b>                     | <b>0.009</b>      | 0.692          | 0.053              | 0.732          | 0.043               | 0.532          | 0.065            | 0.654          | 0.042           | 0.546          | 0.075             | 0.586          | 0.042             |  |
|                 | ROS enzymes               | NOX-1   | 0.425                            | 0.367             | 0.374          | 0.375              | 0.353          | 0.364               | 0.374          | 0.296            | 0.536          | 0.275           | 0.535          | 0.343             | 0.435          | 0.453             |  |
|                 |                           | NOX-2   | 0.794                            | 0.021             | 0.734          | 0.021              | 0.725          | 0.012               | 0.764          | 0.027            | <b>0.853</b>   | <b>0.007</b>    | 0.744          | 0.034             | 0.743          | 0.027             |  |
|                 |                           | NOX-4   | 0.512                            | 0.275             | 0.375          | 0.353              | 0.374          | 0.243               | 0.374          | 0.346            | 0.475          | 0.335           | 0.524          | 0.243             | 0.635          | 0.335             |  |

# Supplementary Table S3

## kidney permeability in endotoxemic rats (Evans Blue dye (ng/mg))

### mRNA expression (Log2 (fold change))

|                       |                           |              | prophylactic<br>↓<br>therapeutic |              | sham<br>↓<br>sham |              | sham<br>↓<br>ω-3FA |              | ω-3FA<br>↓<br>ω-3FA |              | sham<br>↓<br>AsA |              | AsA<br>↓<br>AsA |              | sham<br>↓<br>Flav |              | Flav<br>↓<br>Flav |              |                |              |              |              |              |
|-----------------------|---------------------------|--------------|----------------------------------|--------------|-------------------|--------------|--------------------|--------------|---------------------|--------------|------------------|--------------|-----------------|--------------|-------------------|--------------|-------------------|--------------|----------------|--------------|--------------|--------------|--------------|
|                       |                           |              | r <sup>2</sup>                   |              | p                 |              | r <sup>2</sup>     |              | p                   |              | r <sup>2</sup>   |              | p               |              | r <sup>2</sup>    |              | p                 |              | r <sup>2</sup> |              | p            |              |              |
|                       |                           |              |                                  |              |                   |              |                    |              |                     |              |                  |              |                 |              |                   |              |                   |              |                |              |              |              |              |
| EndMT markers         | Endothelial proteins      | VE-Cad       | <b>0.813</b>                     | <b>0.009</b> |                   | <b>0.853</b> | <b>0.007</b>       |              | <b>0.842</b>        | <b>0.002</b> |                  | <b>0.813</b> | <b>0.006</b>    |              | <b>0.823</b>      | <b>0.003</b> |                   | <b>0.832</b> | <b>0.004</b>   |              | <b>0.823</b> | <b>0.006</b> |              |
|                       |                           | PECAM        | 0.735                            | 0.14         |                   | 0.754        | 0.025              |              | <b>0.814</b>        | <b>0.003</b> |                  | <b>0.804</b> | <b>0.008</b>    |              | <b>0.831</b>      | <b>0.005</b> |                   | 0.745        | 0.011          |              | 0.703        | 0.038        |              |
|                       |                           | vWF          | 0.743                            | 0.16         |                   | 0.536        | 0.043              |              | <b>0.834</b>        | <b>0.031</b> |                  | 0.735        | 0.023           |              | 0.723             | 0.032        |                   | 0.634        | 0.031          |              | <b>0.843</b> | <b>0.006</b> |              |
|                       |                           | Col IV       | 0.757                            | 0.15         |                   | 0.647        | 0.023              |              | 0.753               | 0.023        |                  | 0.712        | 0.056           |              | 0.721             | 0.024        |                   | 0.628        | 0.023          |              | 0.754        | 0.034        |              |
|                       | Fibrotic and ECM proteins | α-SMA        | <b>0.843</b>                     | <b>0.005</b> |                   | <b>0.821</b> | <b>0.003</b>       |              | <b>0.853</b>        | <b>0.006</b> |                  | <b>0.813</b> | <b>0.003</b>    |              | <b>0.821</b>      | <b>0.003</b> |                   | <b>0.812</b> | <b>0.004</b>   |              | <b>0.864</b> | <b>0.001</b> |              |
|                       |                           | SM22α        | <b>0.814</b>                     | <b>0.007</b> |                   | <b>0.842</b> | <b>0.007</b>       |              | <b>0.876</b>        | <b>0.003</b> |                  | <b>0.821</b> | <b>0.002</b>    |              | 0.734             | 0.034        |                   | 0.743        | 0.043          |              | 0.742        | 0.047        |              |
|                       |                           | FSP-1        | <b>0.822</b>                     | <b>0.003</b> |                   | 0.742        | 0.017              |              | <b>0.824</b>        | <b>0.006</b> |                  | 0.623        | 0.232           |              | <b>0.832</b>      | <b>0.002</b> |                   | 0.712        | 0.047          |              | 0.697        | 0.041        |              |
|                       |                           | Col I        | 0.753                            | 0.034        |                   | 0.764        | 0.023              |              | 0.753               | 0.006        |                  | 0.653        | 0.423           |              | 0.702             | 0.045        |                   | 0.624        | 0.041          |              | <b>0.843</b> | <b>0.006</b> |              |
|                       |                           | Col III      | <b>0.842</b>                     | <b>0.003</b> |                   | <b>0.824</b> | <b>0.002</b>       |              | <b>0.846</b>        | <b>0.007</b> |                  | <b>0.823</b> | <b>0.005</b>    |              | <b>0.812</b>      | <b>0.007</b> |                   | <b>0.834</b> | <b>0.002</b>   |              | <b>0.803</b> | <b>0.003</b> |              |
|                       |                           | FN           | 0.721                            | 0.034        |                   | <b>0.815</b> | <b>0.004</b>       |              | <b>0.823</b>        | <b>0.003</b> |                  | 0.694        | 0.150           |              | 0.701             | 0.032        |                   | 0.635        | 0.059          |              | 0.745        | 0.043        |              |
|                       | EndMT inducers            | IL-1β        | 0.665                            | 0.031        |                   | 0.713        | 0.012              |              | <b>0.853</b>        | <b>0.003</b> |                  | 0.702        | 0.037           |              | 0.712             | 0.032        |                   | <b>0.832</b> | <b>0.002</b>   |              | 0.624        | 0.021        |              |
|                       |                           | IL-6         | 0.745                            | 0.024        |                   | 0.743        | 0.010              |              | 0.742               | 0.031        |                  | 0.643        | 0.039           |              | 0.701             | 0.023        |                   | <b>0.875</b> | <b>0.001</b>   |              | 0.657        | 0.042        |              |
|                       |                           | TNF-α        | <b>0.864</b>                     | <b>0.008</b> |                   | <b>0.813</b> | <b>0.006</b>       |              | <b>0.843</b>        | <b>0.004</b> |                  | <b>0.823</b> | <b>0.002</b>    |              | <b>0.822</b>      | <b>0.004</b> |                   | <b>0.823</b> | <b>0.004</b>   |              | <b>0.812</b> | <b>0.006</b> |              |
|                       |                           | TGF-β1       | 0.756                            | 0.024        |                   | 0.535        | 0.143              |              | 0.634               | 0.243        |                  | 0.732        | 0.021           |              | 0.612             | 0.047        |                   | 0.745        | 0.032          |              | 0.536        | 0.054        |              |
|                       |                           | TGF-β2       | 0.626                            | 0.45         |                   | 0.723        | 0.087              |              | 0.646               | 0.353        |                  | 0.624        | 0.244           |              | 0.633             | 0.038        |                   | 0.632        | 0.045          |              | 0.684        | 0.067        |              |
|                       | EndMT signaling           | Receptors    | IL1R                             | <b>0.846</b> | <b>0.005</b>      |              | 0.735              | 0.032        |                     | 0.742        | 0.018            |              | 0.732           | 0.032        |                   | 0.742        | 0.032             |              | 0.723          | 0.034        |              | 0.793        | 0.041        |
|                       |                           |              | IL6R                             | 0.753        | 0.021             |              | 0.712              | 0.039        |                     | 0.635        | 0.021            |              | <b>0.842</b>    | <b>0.003</b> |                   | 0.767        | 0.022             |              | 0.624          | 0.045        |              | <b>0.821</b> | <b>0.006</b> |
|                       |                           |              | TNFR                             | 0.646        | 0.032             |              | 0.756              | 0.041        |                     | 0.754        | 0.026            |              | 0.643           | 0.046        |                   | <b>0.834</b> | <b>0.005</b>      |              | 0.734          | 0.037        |              | <b>0.902</b> | <b>0.002</b> |
|                       |                           |              | TβRI                             | 0.635        | 0.028             |              | 0.748              | 0.043        |                     | 0.642        | 0.038            |              | 0.597           | 0.142        |                   | 0.745        | 0.034             |              | 0.634          | 0.047        |              | <b>0.843</b> | <b>0.004</b> |
| TβRII                 |                           |              | 0.685                            | 0.034        |                   | 0.623        | 0.053              |              | 0.746               | 0.033        |                  | 0.643        | 0.243           |              | 0.646             | 0.040        |                   | 0.697        | 0.049          |              | 0.723        | 0.023        |              |
| Transcription factors |                           | NF-κB        | <b>0.853</b>                     | <b>0.003</b> |                   | <b>0.825</b> | <b>0.007</b>       |              | <b>0.824</b>        | <b>0.003</b> |                  | <b>0.832</b> | <b>0.002</b>    |              | <b>0.804</b>      | <b>0.005</b> |                   | <b>0.823</b> | <b>0.005</b>   |              | <b>0.854</b> | <b>0.007</b> |              |
|                       |                           | Smad4        | <b>0.854</b>                     | <b>0.002</b> |                   | 0.765        | 0.010              |              | 0.745               | 0.034        |                  | 0.734        | 0.023           |              | 0.744             | 0.032        |                   | 0.723        | 0.043          |              | 0.732        | 0.041        |              |
|                       |                           | Slug         | <b>0.824</b>                     | <b>0.003</b> |                   | 0.643        | 0.042              |              | <b>0.844</b>        | <b>0.004</b> |                  | 0.753        | 0.021           |              | 0.795             | 0.012        |                   | 0.721        | 0.038          |              | <b>0.832</b> | <b>0.005</b> |              |
|                       |                           | Twist        | <b>0.864</b>                     | <b>0.002</b> |                   | 0.647        | 0.044              |              | <b>0.864</b>        | <b>0.002</b> |                  | 0.744        | 0.026           |              | <b>0.832</b>      | <b>0.004</b> |                   | 0.657        | 0.043          |              | 0.634        | 0.041        |              |
|                       |                           | Snail        | 0.753                            | 0.015        |                   | 0.753        | 0.021              |              | 0.647               | 0.040        |                  | 0.634        | 0.046           |              | 0.753             | 0.022        |                   | 0.686        | 0.048          |              | 0.684        | 0.042        |              |
|                       |                           | Zeb-1        | <b>0.832</b>                     | <b>0.006</b> |                   | 0.785        | 0.015              |              | 0.624               | 0.048        |                  | 0.647        | 0.048           |              | 0.634             | 0.054        |                   | 0.676        | 0.049          |              | 0.623        | 0.047        |              |
| ROS enzymes           | NOX-1                     | 0.524        | 0.285                            |              | 0.435             | 0.453        |                    | 0.536        | 0.364               |              | 0.435            | 0.321        |                 | 0.435        | 0.285             |              | 0.634             | 0.104        |                | 0.474        | 0.224        |              |              |
|                       | NOX-2                     | <b>0.853</b> | <b>0.007</b>                     |              | 0.745             | 0.032        |                    | <b>0.834</b> | <b>0.002</b>        |              | 0.735            | 0.023        |                 | <b>0.845</b> | <b>0.006</b>      |              | 0.721             | 0.038        |                | <b>0.834</b> | <b>0.004</b> |              |              |
|                       | NOX-4                     | 0.684        | 0.087                            |              | 0.536             | 0.078        |                    | 0.446        | 0.007               |              | 0.495            | 0.335        |                 | 0.423        | 0.242             |              | 0.635             | 0.098        |                | 0.423        | 0.243        |              |              |

## Supplementary Table S4

**Supplementary Table S4.** Summary of actions of dietary  $\omega$ -3 fatty acids, ascorbic acid, and polyphenolic antioxidant flavonoid supplements on gene expression, organ failure and mortality in endotoxemic-induced septic rats.

|                                    |                 | Supplementation: | Sham | $\omega$ -3 Fatty acid |              | Ascorbid Acid |              | Flavonoid   |              |
|------------------------------------|-----------------|------------------|------|------------------------|--------------|---------------|--------------|-------------|--------------|
|                                    |                 | Protocol:        |      | Therapeutic            | Prophylactic | Therapeutic   | Prophylactic | Therapeutic | Prophylactic |
| Gene expression                    | EndMT markers   | VE-Cad           | **   | *                      | NS           | **            | *            | *           | NS           |
|                                    |                 | PECAM            | **   | NS                     | NS           | **            | *            | *           | NS           |
|                                    |                 | vWF              | **   | NS                     | NS           | **            | *            | *           | NS           |
|                                    |                 | Col IV           | ***  | *                      | *            | **            | *            | *           | NS           |
|                                    |                 | $\alpha$ -SMA    | ***  | *                      | NS           | ***           | *            | **          | NS           |
|                                    |                 | SM22 $\alpha$    | ***  | *                      | *            | ***           | *            | *           | *            |
|                                    |                 | FSP-1            | ***  | NS                     | NS           | *             | *            | *           | NS           |
|                                    |                 | Col I            | ***  | NS                     | NS           | *             | *            | **          | NS           |
|                                    |                 | Col III          | ***  | NS                     | NS           | ***           | **           | ***         | NS           |
|                                    |                 | FN               | ***  | NS                     | NS           | ***           | **           | ***         | NS           |
|                                    | EndMT inducers  | IL-1 $\beta$     | ***  | NS                     | NS           | ***           | **           | ***         | NS           |
|                                    |                 | IL-6             | **   | NS                     | NS           | *             | *            | *           | NS           |
|                                    |                 | TNF- $\alpha$    | ***  | *                      | *            | **            | *            | *           | *            |
|                                    |                 | TGF- $\beta$ 1   | ***  | NS                     | NS           | **            | *            | **          | NS           |
|                                    |                 | TGF- $\beta$ 2   | **   | NS                     | NS           | *             | *            | *           | NS           |
|                                    | EndMT signaling | IL1R             | ***  | *                      | NS           | **            | ***          | ***         | NS           |
|                                    |                 | IL6R             | ***  | *                      | NS           | **            | ***          | ***         | NS           |
|                                    |                 | TNFR             | ***  | **                     | *            | ***           | ***          | ***         | *            |
|                                    |                 | T $\beta$ RI     | *    | *                      | NS           | NS            | NS           | NS          | NS           |
|                                    |                 | T $\beta$ RII    | NS   | NS                     | NS           | NS            | NS           | NS          | NS           |
|                                    |                 | NF- $\kappa$ B   | ***  | **                     | NS           | ***           | ***          | **          | NS           |
|                                    |                 | Smad4            | ***  | **                     | NS           | ***           | ***          | **          | NS           |
|                                    |                 | Slug             | ***  | **                     | NS           | ***           | ***          | **          | NS           |
|                                    |                 | Twist            | ***  | *                      | NS           | **            | ***          | **          | NS           |
|                                    |                 | Snail            | ***  | *                      | NS           | ***           | ***          | **          | NS           |
|                                    |                 | Zeb-1            | ***  | **                     | NS           | **            | *            | **          | NS           |
|                                    |                 | NOX-1            | NS   | NS                     | NS           | NS            | NS           | NS          | NS           |
|                                    |                 | NOX-2            | ***  | **                     | *            | **            | *            | *           | *            |
|                                    |                 | NOX-4            | NS   | NS                     | NS           | NS            | NS           | NS          | NS           |
| Vascular permeability              | Mesentery       | ***              | **   | *                      | ***          | **            | **           | **          | **           |
|                                    | Liver           | ***              | **   | *                      | ***          | **            | ***          | **          | **           |
|                                    | Kidney          | ***              | **   | NS                     | ***          | ***           | ***          | **          | **           |
| Non-survivor Vascular permeability | Mesentery       | *                | *    | *                      | NS           | NS            | NS           | *           | *            |
|                                    | Liver           | *                | *    | *                      | NS           | NS            | NS           | *           | *            |
|                                    | Kidney          | *                | *    | *                      | NS           | NS            | NS           | *           | *            |
| Systolic pressure                  |                 | ***              | ***  | *                      | ***          | ***           | ***          | ***         | **           |
| Heart rate                         |                 | ***              | **   | NS                     | ***          | ***           | ***          | ***         | **           |
| MODS                               | ALT             | ***              | **   | NS                     | ***          | ***           | ***          | ***         | **           |
|                                    | AST             | ***              | **   | *                      | ***          | ***           | ***          | ***         | **           |
|                                    | TBIL            | ***              | **   | *                      | ***          | ***           | ***          | ***         | ***          |
|                                    | GGT             | ***              | **   | NS                     | ***          | ***           | **           | *           | *            |
|                                    | Lac             | ***              | **   | *                      | ***          | ***           | ***          | ***         | ***          |
|                                    | CRE             | ***              | **   | *                      | **           | **            | **           | **          | *            |
|                                    | BUN             | ***              | **   | *                      | **           | **            | **           | **          | **           |
|                                    | BUN/CRE         | ***              | ***  | NS                     | ***          | ***           | ***          | ***         | ***          |
|                                    | eGFR            | **               | **   | NS                     | **           | **            | **           | **          | **           |
|                                    | Gly             | **               | *    | NS                     | **           | **            | **           | **          | **           |
| Mortality at 7 days                |                 | 75 %             | 50 % | 17 %                   | 75 %         | 67 %          | 67 %         | 50 %        |              |
| Risk of death                      |                 | ‡‡‡              | NS   | NS                     | ‡‡‡          | ‡‡            | ‡‡           | NS          |              |

\*: p-value < 0.05; \*\*: p-value < 0.01; \*\*\*: p-value < 0.001; ‡: p-value < 0.05; ‡‡: p-value < 0.01; NS: non-significant change. All compared with saline-treated rats.

Supplementary Figure S1

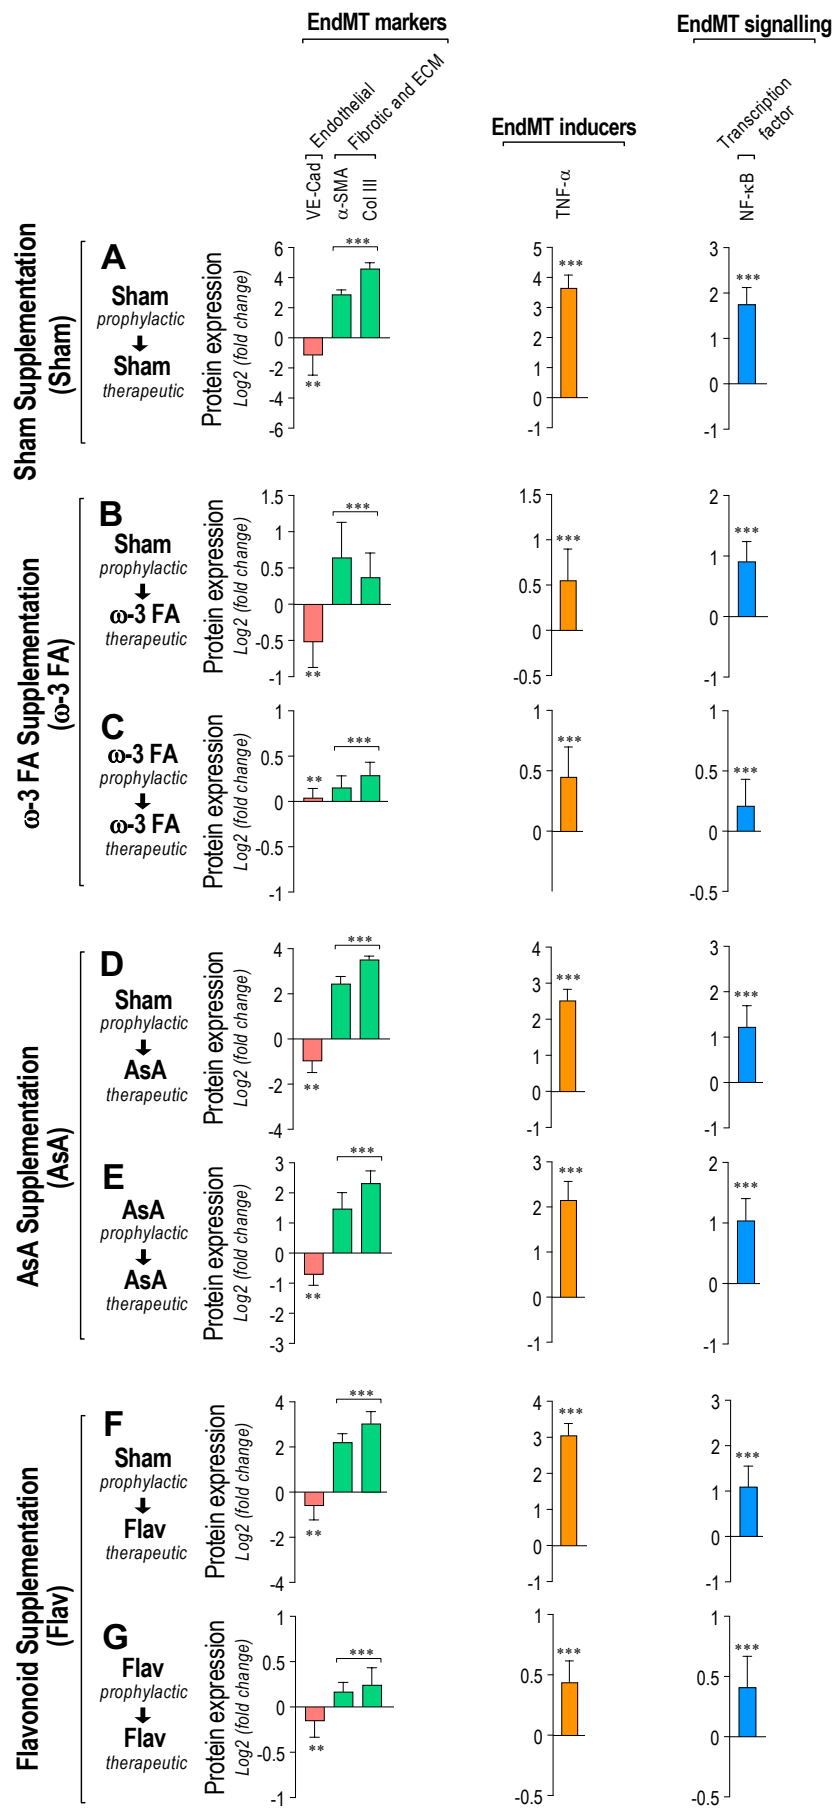

Supplement: s1 [file s1]
